# Supplementary figures and images for: Prevalence of Atrial Fibrillation and Relation to Echocardiographic Parameters in a Healthy Asymptomatic Rural Korean Population
Source: PubMed Central journal article supplement — J Korean Med Sci. 2015 Jul 15;30(8):1078–84. doi: 10.3346/jkms.2015.30.8.1078 (PMC4520938; doi:10.3346/jkms.2015.30.8.1078), 2015-07-15

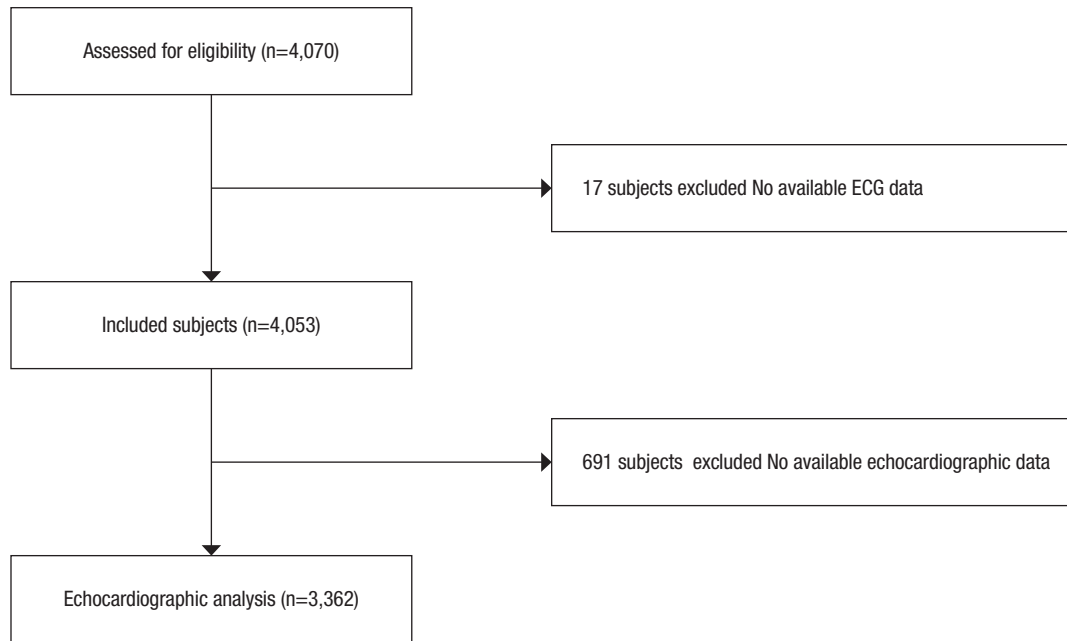

Supplementary Fig. 1. Diagram of enrollment

Supplement: jkms-30-1078-s001.pdf [file jkms-30-1078-s001.pdf]
